# Supplementary material for: MEX3A regulates Lgr5 + stem cell maintenance in the developing intestinal epithelium
Source: PubMed Central journal article supplement (PMC7132344; doi:10.15252/embr.201948938), 2020-02-13
Supplement: EMBR-21-e48938-s001.pdf [file EMBR-21-e48938-s001.pdf]

## Table of contents

|                                                                                                                        |    |
|------------------------------------------------------------------------------------------------------------------------|----|
| Appendix Figure S1: Macroscopic assessment of major organs in the <i>Mex3a</i> mutant mice .....                       | 2  |
| Appendix Figure S2: <i>Mex3a</i> deletion leads to histological alterations in the proximal small intestine .....      | 3  |
| Appendix Figure S3: Reduction in the number of proliferating cells upon <i>Mex3a</i> deletion impacts crypt size ..... | 4  |
| Appendix Figure S4: <i>Mex3a</i> KO cells exhibit a delayed transition from spheroid to budding organoid stage .....   | 5  |
| Appendix Figure S5. MEX3A regulates PPAR $\gamma$ expression in cancer cell lines ...                                  | 6  |
| Appendix Figure S6. Caco-2 MEX3A-overexpressing cells present low metabolic output .....                               | 8  |
| Appendix Table S1. List of primers used in this study .....                                                            | 10 |
| Appendix Table S2. List of antibodies used in this study .....                                                         | 12 |

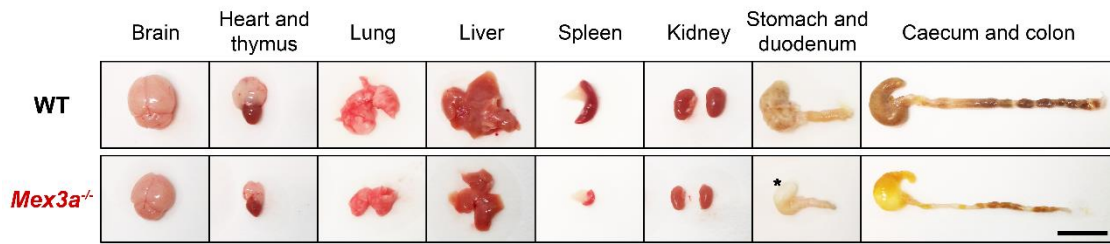

**Appendix Figure S1: Macroscopic assessment of major organs in the *Mex3a* mutant mice.**

Representative images of the different organs of a *Mex3a* null mouse and a littermate control are shown for size comparison. In accordance with body mass, all organs of the *Mex3a* null animal are smaller compared to the control. Of note, milk (\*) is still visible in the stomach of the mutant mouse at this stage (P21). Scale bar, 1 cm.

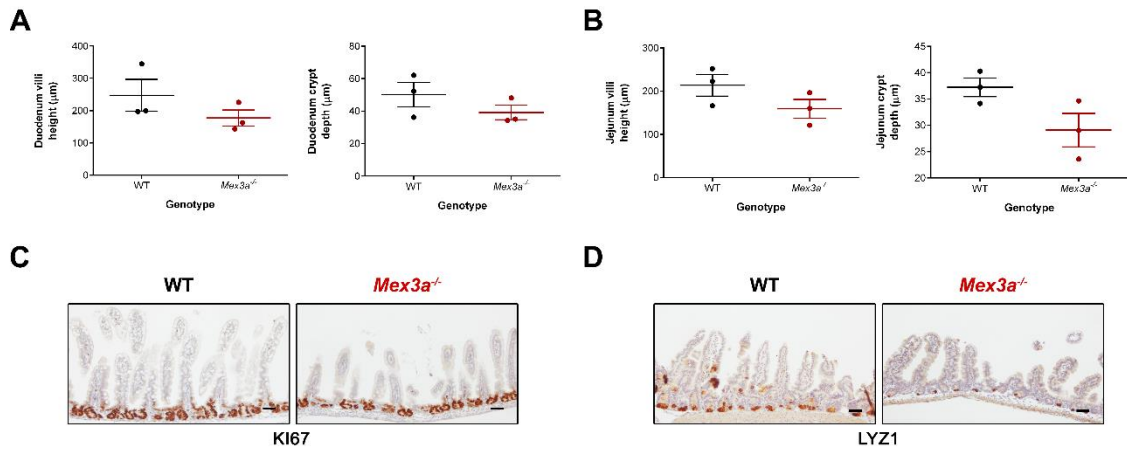

**Appendix Figure S2: *Mex3a* deletion leads to histological alterations in the proximal small intestine.**

A and B. Average villi height and crypt depth in (A) duodenum and (B) jejunum of WT and *Mex3a* KO animals. Data are presented as mean  $\pm$  standard error (n = 3 for each genotype, > 10 villi and > 20 crypts counted per animal).

C and D. Representative immunohistochemistry staining for (C) the proliferation marker KI67 and (D) the Paneth cell marker LYZ1 in the proximal jejunum of WT and *Mex3a* KO mice. Scale bars, 50  $\mu$ m.

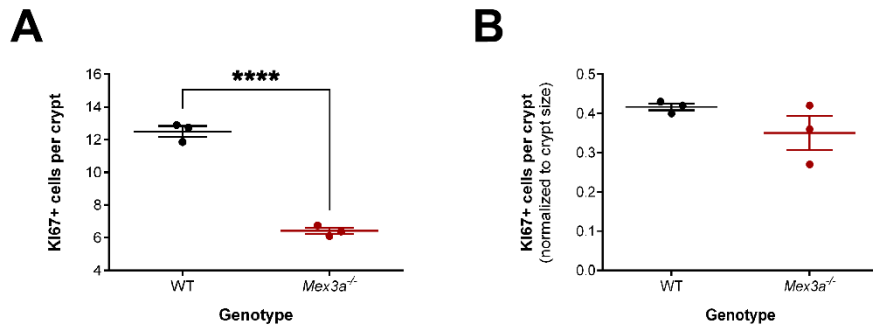

**Appendix Figure S3: Reduction in the number of proliferating cells upon *Mex3a* deletion impacts crypt size**

A. Average KI67+ cells per crypt in WT versus *Mex3a* KO animals.

B. Number of KI67+ cells normalized to crypt size in WT versus *Mex3a* KO animals.

Data information: Data are presented as mean ± standard error (n = 3 for each genotype, > 20 crypts counted per animal). \*\*\*\**P* < 0.0001, Student's *t* test.

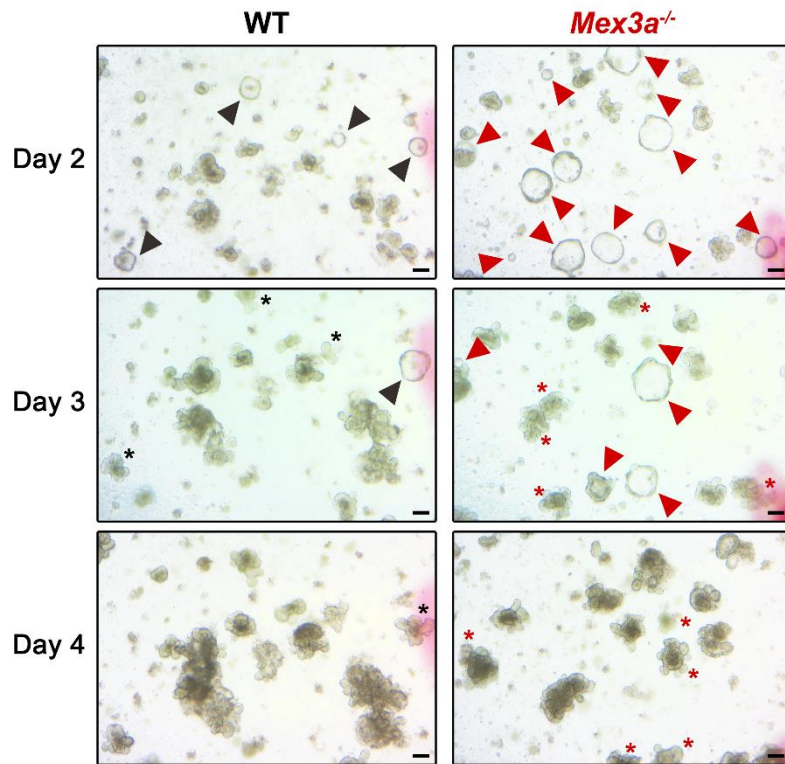

**Appendix Figure S4: *Mex3a* KO cells exhibit a delayed transition from spheroid to budding organoid stage**

Representative phase contrast microscopy images of intestinal organoids generated from *Mex3a* KO and WT cells from day 2 to day 4 of culture. A cohort of individual *Mex3a* KO spheroids (red arrowheads) shows delayed conversion into budding organoids (red asterisks) when compared to WT (black arrowheads and black asterisks), which are already present in a reduced number at the starting point. Scale bars, 100 $\mu$ m

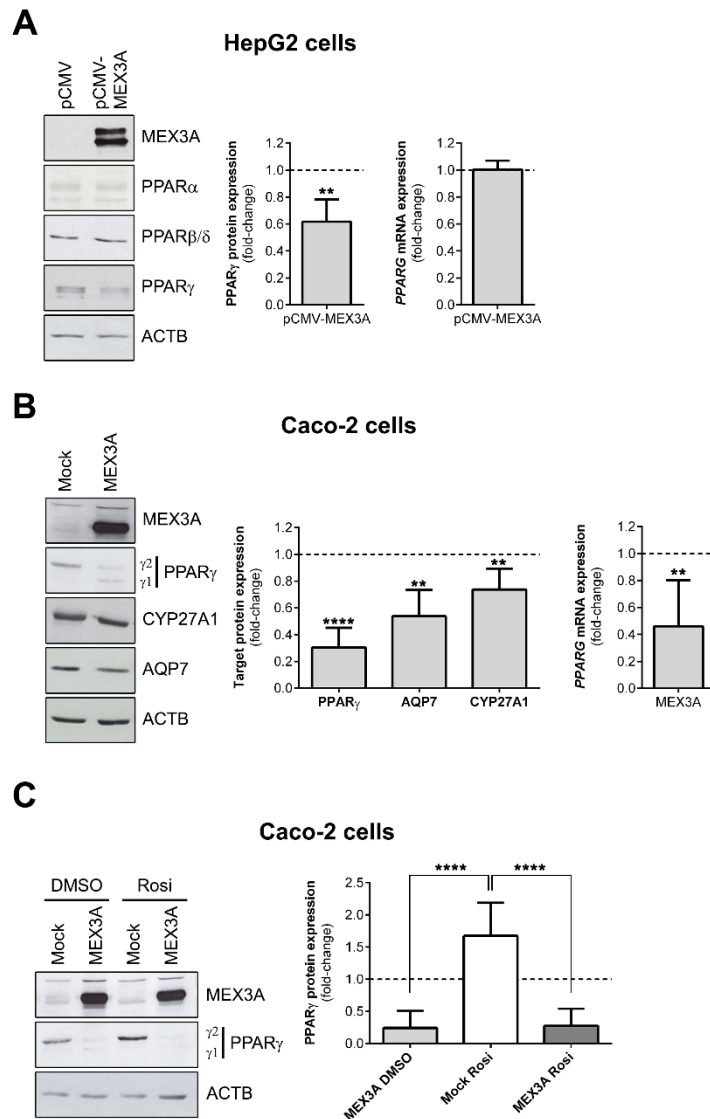

**Appendix Figure S5. MEX3A regulates PPAR $\gamma$  expression in cancer cell lines**

A. Representative western blots of MEX3A transient overexpression experiments in the HepG2 cell line. Data is presented as mean fold-change with 95% confidence interval ( $n = 3$ ) for PPAR $\gamma$  protein *PPARG* mRNA expression levels in pCMV-MEX3A transfected cells relative to empty-vector (pCMV) transfected cells (dashed lines).  $**P = 0.0099$ , Student's *t* test.

B. Representative western blots of MEX3A stable overexpression in Caco-2 cells. The two main PPAR $\gamma$  isoforms ( $\gamma 1$  and  $\gamma 2$ ) are clearly distinguishable. Data is presented as mean fold-change with 95% confidence interval ( $n = 6$ ) for PPAR $\gamma 2$ , AQP7 and CYP27A1 protein levels, as well as for *PPARG* mRNA levels in MEX3A-overexpressing cells relative to mock cells (dashed lines).  $****P < 0.0001$ ,  $**P < 0.01$ , Student's *t* test.

C. Representative western blots of Caco-2 cells treated with 20  $\mu$ M Rosiglitazone or vehicle-treated with DMSO. Data is presented as mean fold-change with 95% confidence interval (n = 4) for PPAR $\gamma$ 2 protein expression relative to vehicle-treated mock cells (dashed line). \*\*\*\* $P < 0.0001$ , two-way ANOVA test.

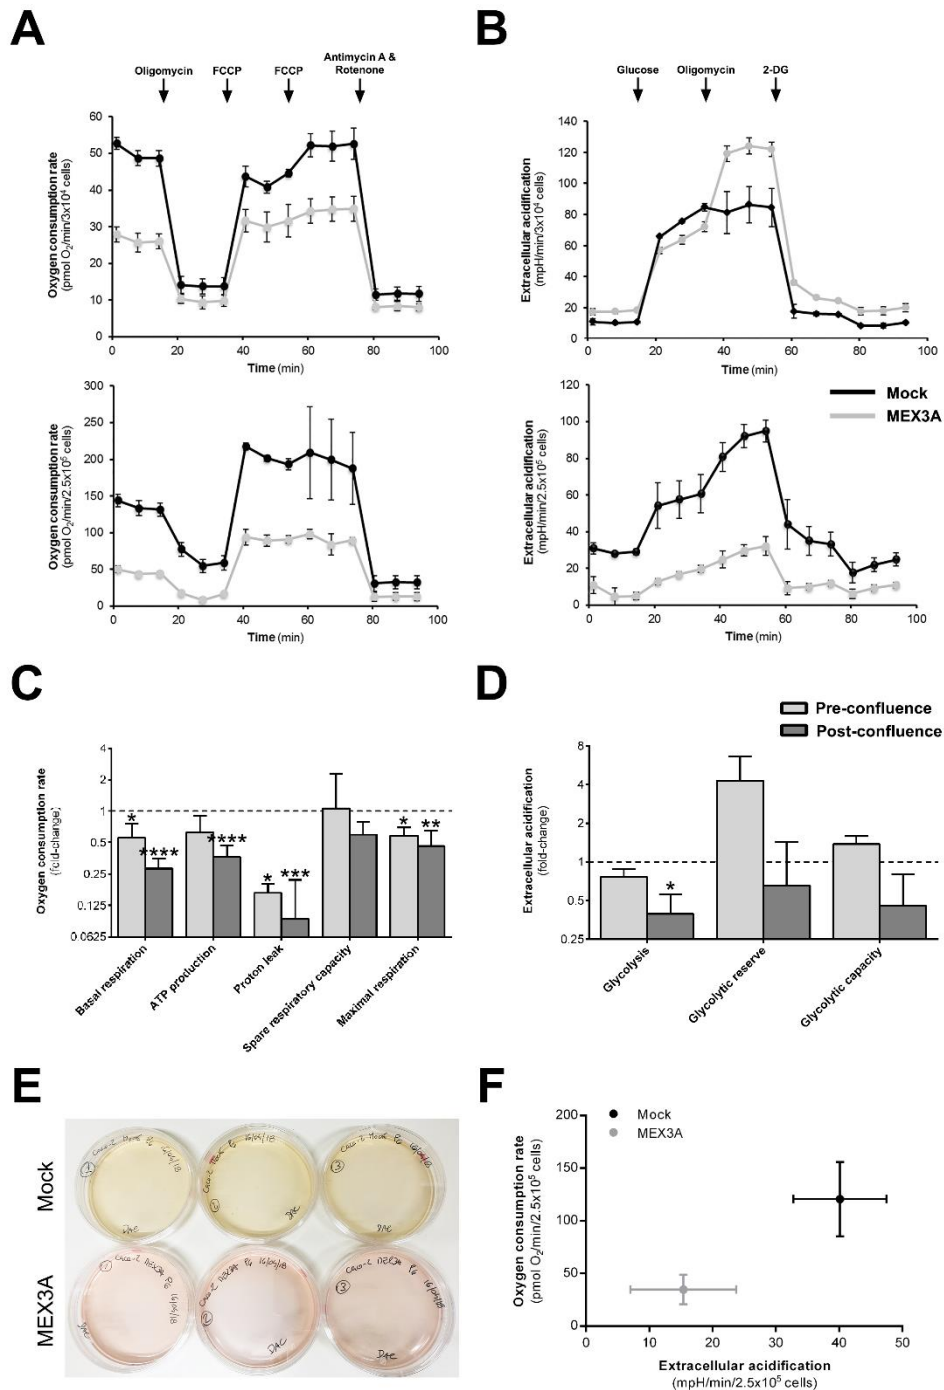

**Appendix Figure S6. Caco-2 MEX3A-overexpressing cells present low metabolic output**

A and B. Representative measurements of oxygen consumption (A) and extracellular acidification rate (B) in Caco-2 cells during pre-confluent (upper panels) or post-confluent (lower panels) cell culture conditions using the Seahorse Bioscience XF96 Extracellular Flux Analyzer.

C and D. The relative levels of key parameters of mitochondrial (C) and glycolytic (D) functions were calculated based on the measurements obtained upon addition of the



compounds indicated above (FCCP: Carbonyl cyanide-4 [trifluoromethoxy] phenylhydrazone; 2-DG: 2-deoxy-glucose). Data is presented as mean fold-change with range (n = 3 for pre-confluence and n = 5 for post-confluence) of MEX3A-overexpressing cells relative to mock cells (dashed line). \* $P < 0.05$ , \*\* $P < 0.01$ , \*\*\* $P < 0.001$ , \*\*\* $P < 0.001$ , Student's  $t$  test.

E. Difference in culture medium pH between mock and MEX3A-overexpressing cells during post-confluent culture conditions.

F. Energy map depicting basal oxygen consumption and glycolysis levels of mock and MEX3A-overexpressing cells in post-confluent culture conditions.

**Appendix Table S1. List of primers used in this study**

**Expression**

| <b>Gene</b>           | <b>Sense</b>            | <b>Antisense</b>        |
|-----------------------|-------------------------|-------------------------|
| <b><i>Apoa1</i></b>   | ACAGCTGAACCTGAATCTCCT   | ATCCCAGAAGTCCCGAGTCA    |
| <b><i>Angptl4</i></b> | ATCTTCAGAGCCAGATAGACC   | AGCTGGGTCATCTTGGGAAG    |
| <b><i>Aqp7</i></b>    | CCTGGATGAGGCATTTCGTGAC  | CCCTTGAAGTGCTGGACTGT    |
| <b><i>Axin2</i></b>   | TGGCCAGTCAGCAGAGGGACA   | TTTGGCTCTTTGTGATCTTCTGG |
| <b><i>Ccnd1</i></b>   | CTGCTGCAAATGGAAGTCTTC   | GCTTGTTCATCCGCCTCT      |
| <b><i>Cd36</i></b>    | GGCCAAGCTATTGCGACATG    | ACAGCGTAGATAGACCTGCA    |
| <b><i>Cidec</i></b>   | AGGTCGCTGTCCAGGCATGT    | ATCTGCGGTGCTAACACGA     |
| <b><i>Cyp27a1</i></b> | TGGACACGACATCCAACAC     | ATGTGGGCAAAGTCCTTGTGC   |
| <b><i>Egf</i></b>     | GGCATGAACTATGAAGATGAC   | CCCTGGCAAACCTTTTCAGA    |
| <b><i>Fzd2</i></b>    | TCCTCACATGGTCGGTGTTG    | GTGTAGCAGCCGGACAGAAAG   |
| <b><i>Hopx</i></b>    | AGACGCAGAAATGGTTTAAGC   | TCCAAGAGCAAGCTCAAGGG    |
| <b><i>Kcne3</i></b>   | CTGAACTGTTTGATCACATTCCA | TACCAGGTCTCAGTCCCGTT    |
| <b><i>Lgr5</i></b>    | AGCGTCTTCACCTCCTACCTG   | CTTGGGAATGTGTGTCAAAGC   |
| <b><i>Lrig1</i></b>   | CAAGCTGACTCTGTTTGGAAAC  | ACTGGACAGACCTGATTGC     |
| <b><i>Lyz1</i></b>    | ACAATCGTTGTGAGTTGGCCAG  | TAAACACACCCAGTCAGCCAG   |
| <b><i>Nog</i></b>     | CCATCCAAGTCTGTGCACCT    | GAGTTCTAGCAGGAACACTTAC  |
| <b><i>Olfm4</i></b>   | TTCTAAGGTGAAGGAGTATGTC  | ATGCTGTCCTTCTCCATGACC   |
| <b><i>Pdk4</i></b>    | AGTCCAAGATGCCTTTGAGTG   | TTTCCATTGACTTGTGTGAGG   |
| <b><i>Pcna</i></b>    | GGGCTGAAGATAATGCAGACA   | TGTA CTCTGTTCTGGGATTC   |
| <b><i>Pparg</i></b>   | CGGACAAATCACCATTTGTCATC | GATGGCCACCTCTTTGCTCT    |
| <b><i>Prelp</i></b>   | AGCATAGAGAAAATCAACGGGA  | TGGGATGGGAGGCTTCAGAA    |
| <b><i>Rspo1</i></b>   | GCCACAACCTTCTGCACCAAG   | ATTTACATTGTGCAGGACTG    |
| <b><i>Wnt2b</i></b>   | AGGCTGCAGGTTCCCTAGGTA   | GGTGACCCGAGTTGTGTCAT    |
| <b><i>Wnt3</i></b>    | CCTGTCTTGGACAAAGCCAC    | ATGTGAGTCACAGCCGCAGATG  |
| <b><i>18S</i></b>     | CGCCGCTAGAGGTGAAATTC    | CATTCTTGGCAAATGCTTTTCG  |
| <b><i>PPARA</i></b>   | GCAATCCATCGGCGAGGATA    | CTGGTGAAAGCGTGTCCGTG    |
| <b><i>PPARD</i></b>   | AAAAGTTTTGGCAGGAGCGGG   | ACTGTACAACACTGTCCCGGC   |
| <b><i>PPARG</i></b>   | CAGACAAATCACCATTCGTTATC | GATGGCCACCTCTTTGCTCT    |

**Genotyping**

| <b>Gene</b>              | <b>Sense</b>           | <b>Antisense</b>        |
|--------------------------|------------------------|-------------------------|
| <b><i>Mex3a_WT</i></b>   | TGCAGGGTTTCTCTAAACTGG  | ACCAGGGACATGGAGCTTAG    |
| <b><i>Mex3a_LacZ</i></b> | ATCCTCTGCATGGTCAGGTC   | CGTTACGCGTTCGCTCATC     |
| <b><i>Lgr5_WT</i></b>    | CTGCTCTCTGCTCCCAGTCT   | ATACCCCATCCCTTTTGAGC    |
| <b><i>Lgr5_KI</i></b>    | CTGCTCTCTGCTCCCAGTCT   | GAACTTCAGGGTCAGCTTGC    |
| <b><i>Meox2_WT</i></b>   | GGGACCACCTTCTTTTGGCTTC | AAGATGTGGAGAGTTCGGGGTAG |
| <b><i>Meox2_KI</i></b>   | GGGACCACCTTCTTTTGGCTTC | CCAGATCCTCCTCAGAAATCAGC |

**Appendix Table S2. List of antibodies used in this study**

| Antigen                    | Species                                  | Dilution (assay) <sup>a</sup> | Reference  | RRID code   | Source                     |
|----------------------------|------------------------------------------|-------------------------------|------------|-------------|----------------------------|
| ACTB                       | Goat                                     | 1:2000 (WB)                   | sc-1616    | AB_630836   | Santa Cruz Biotech.        |
| AQP7                       | Mouse IgG <sub>2a</sub>                  | 1:500 (WB)                    | sc-376407  | AB_11149931 | Santa Cruz Biotech.        |
| BrdU                       | Mouse IgG <sub>1</sub> (Clone Bu20a)     | 1:75 (IF)                     | M0744      | AB_10013660 | Dako                       |
| CDX2                       | Mouse IgG <sub>1</sub> (Clone CDX2-88)   | 1:50 (IHC)                    | MU392A-UC  | AB_2650531  | Biogenex                   |
| CYP27A1                    | Mouse IgG <sub>2a</sub>                  | 1:500 (WB)                    | sc-390974  | -           | Santa Cruz Biotech.        |
| DCKL1                      | Rabbit                                   | 1:2000 (IHC)                  | ab31704    | AB_873537   | Abcam                      |
| GFP                        | Mouse IgG <sub>2a</sub>                  | 1:250 (IHC)                   | sc-9996    | AB_627695   | Santa Cruz Biotech.        |
| KI67                       | Rabbit (Clone SP6)                       | 1:1000 (IF and IHC)           | ab16667    | AB_302459   | Abcam                      |
| LYZ1                       | Rabbit                                   | 1:1500 (IHC)                  | A0099      | AB_2341230  | Dako                       |
| MEX3A                      | Rabbit                                   | 1:2000 (WB)                   | PRS4869    | AB_1853839  | Sigma                      |
| PPAR $\alpha$              | Mouse IgG <sub>2b</sub> (Clone 3B6/PPAR) | 1:500 (WB)                    | MA1-822    | AB_2165745  | Thermo Fisher Scientific   |
| PPAR $\beta$               | Rabbit                                   | 1:4000 (WB)                   | PA1-823A   | AB_2165895  | Thermo Fisher Scientific   |
| PPAR $\gamma$              | Rabbit (Clone C26H12)                    | 1:300 (IHC);<br>1:1000 (WB)   | #2435      | AB_2166051  | Cell Signalling Technology |
| SYP                        | Rabbit (SP11)                            | 1:100 (IHC)                   | RM-9111-S0 | AB_149939   | Thermo Fisher Scientific   |
| VIL1                       | Mouse IgG <sub>1</sub> (Clone 1D2C3)     | 1:750 (IHC)                   | sc-58897   | AB_2304475  | Santa Cruz Biotech.        |
| Anti-Rabbit (Biotinylated) | Swine                                    | 1:100 (IHC)                   | E0353      | AB_2737292  | Dako                       |
| Anti-Mouse (Biotinylated)  | Rabbit                                   | 1:100 (IHC)                   | E0354      | AB_2687571  | Dako                       |

|                                                   |        |                |         |            |                                |
|---------------------------------------------------|--------|----------------|---------|------------|--------------------------------|
| Anti-Mouse<br>(Alexa Fluor<br>594<br>conjugated)  | Goat   | 1:100<br>(IF)  | A-11032 | AB_141672  | Thermo<br>Fisher<br>Scientific |
| Anti-Rabbit<br>(Alexa Fluor<br>488<br>conjugated) | Goat   | 1:100<br>(IF)  | A-11034 | AB_2576217 | Thermo<br>Fisher<br>Scientific |
| Anti-Goat<br>(HRP<br>conjugated)                  | Donkey | 1:2000<br>(WB) | sc-2020 | AB_631728  | Santa Cruz<br>Biotech.         |
| Anti-Mouse<br>(HRP<br>conjugated)                 | Goat   | 1:2000<br>(WB) | sc-2005 | AB_631736  | Santa Cruz<br>Biotech.         |
| Anti-Rabbit<br>(HRP<br>conjugated)                | Goat   | 1:2000<br>(WB) | sc-2004 | AB_631746  | Santa Cruz<br>Biotech.         |

a) IF - Immunofluorescence; IHC - Immunohistochemistry; WB - Western blot
